# Supplementary material for: Mutant CTNNB1 and histological heterogeneity define metabolic subtypes of hepatoblastoma
Source: PubMed Central journal article supplement (PMC5666308; doi:10.15252/emmm.201707814), 2017-09-19
Supplement: EMMM-9-1589-s002.pdf [file EMMM-9-1589-s002.pdf]

## Expanded View Figures

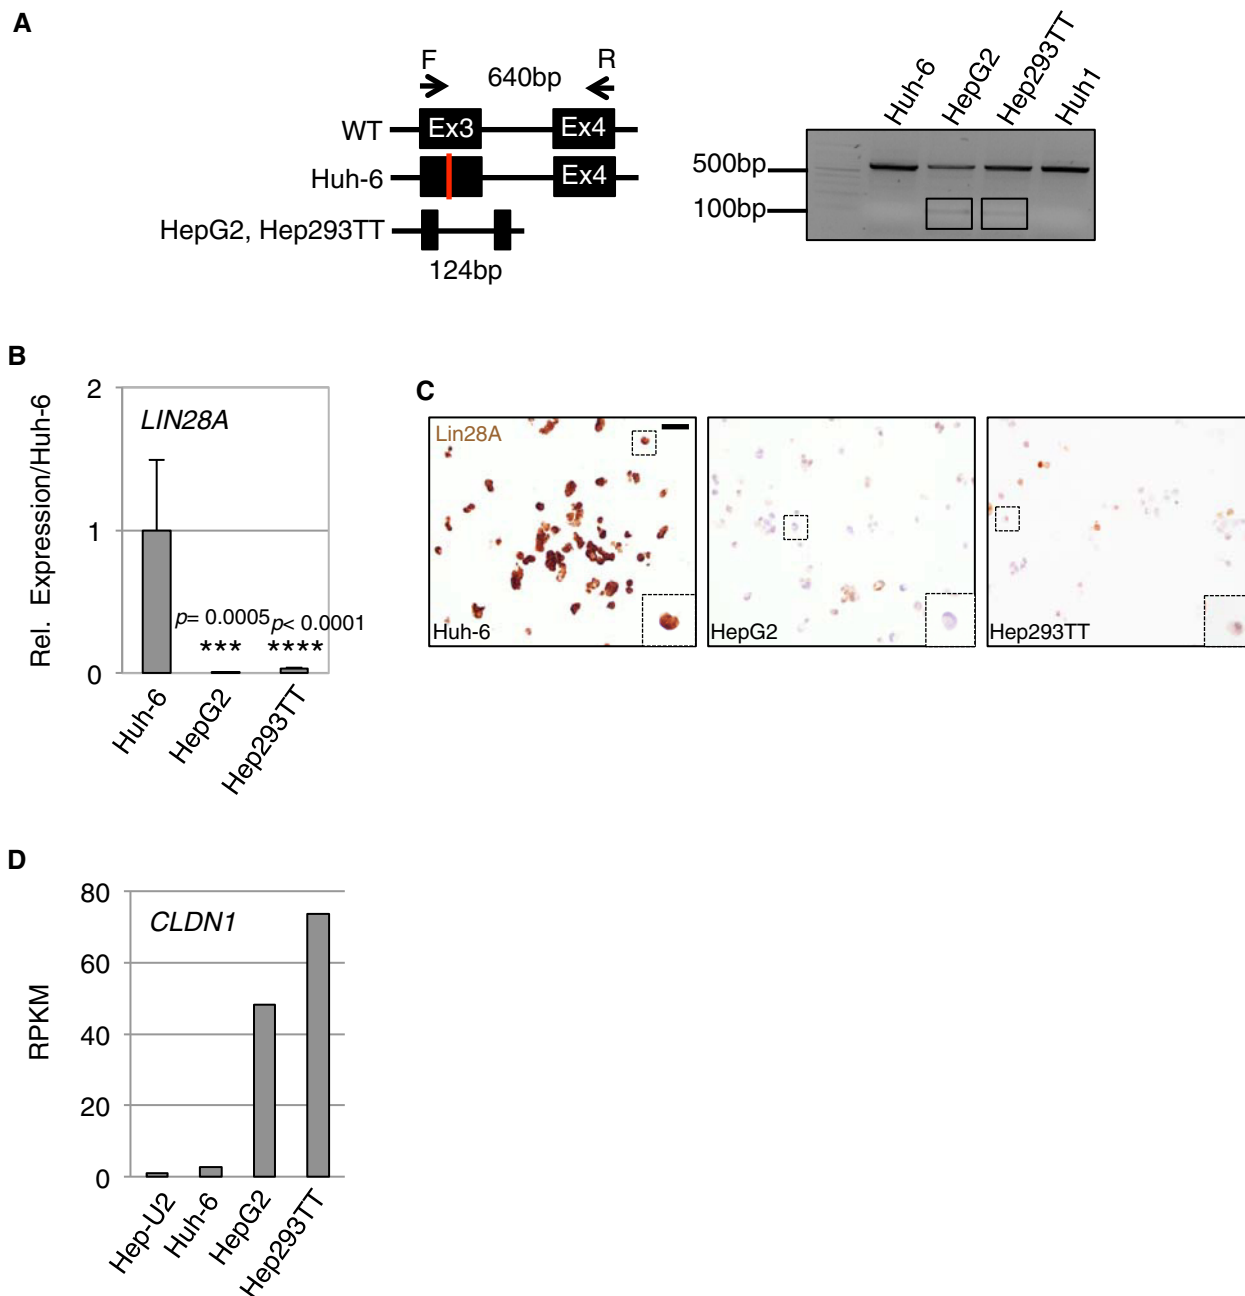

**Figure EV1. Molecular characterization of embryonal and fetal-like HB cells.**

A Schematic representation of the primers used to amplify the genomic region spanning exon 3 to exon 4 of the *CTNNB1* gene (left panel). Genomic DNA was isolated from the indicated cell lines and amplified by PCR. A PCR product of 640 bp was obtained from the full-length *CTNNB1* gene. The appearance of a 124-bp band in HepG2 and Hep293TT indicated a heterozygous deletion of *CTNNB1* gene (right panel).

B Real-time PCR analysis for the expression of *LIN28A* in the indicated cell lines. Data show means  $\pm$  s.d. ( $n = 3$ ).  $P$ -values were determined by Mann–Whitney test.

C Immunocytochemistry of Lin28A on the indicated cell lines. Dashed squares highlight a zoom on a cell. Scale bar: 20  $\mu$ m.

D Expression analysis (RPKM) of the fetal marker claudin-1 (*CLDN1*) in the HB cell lines.

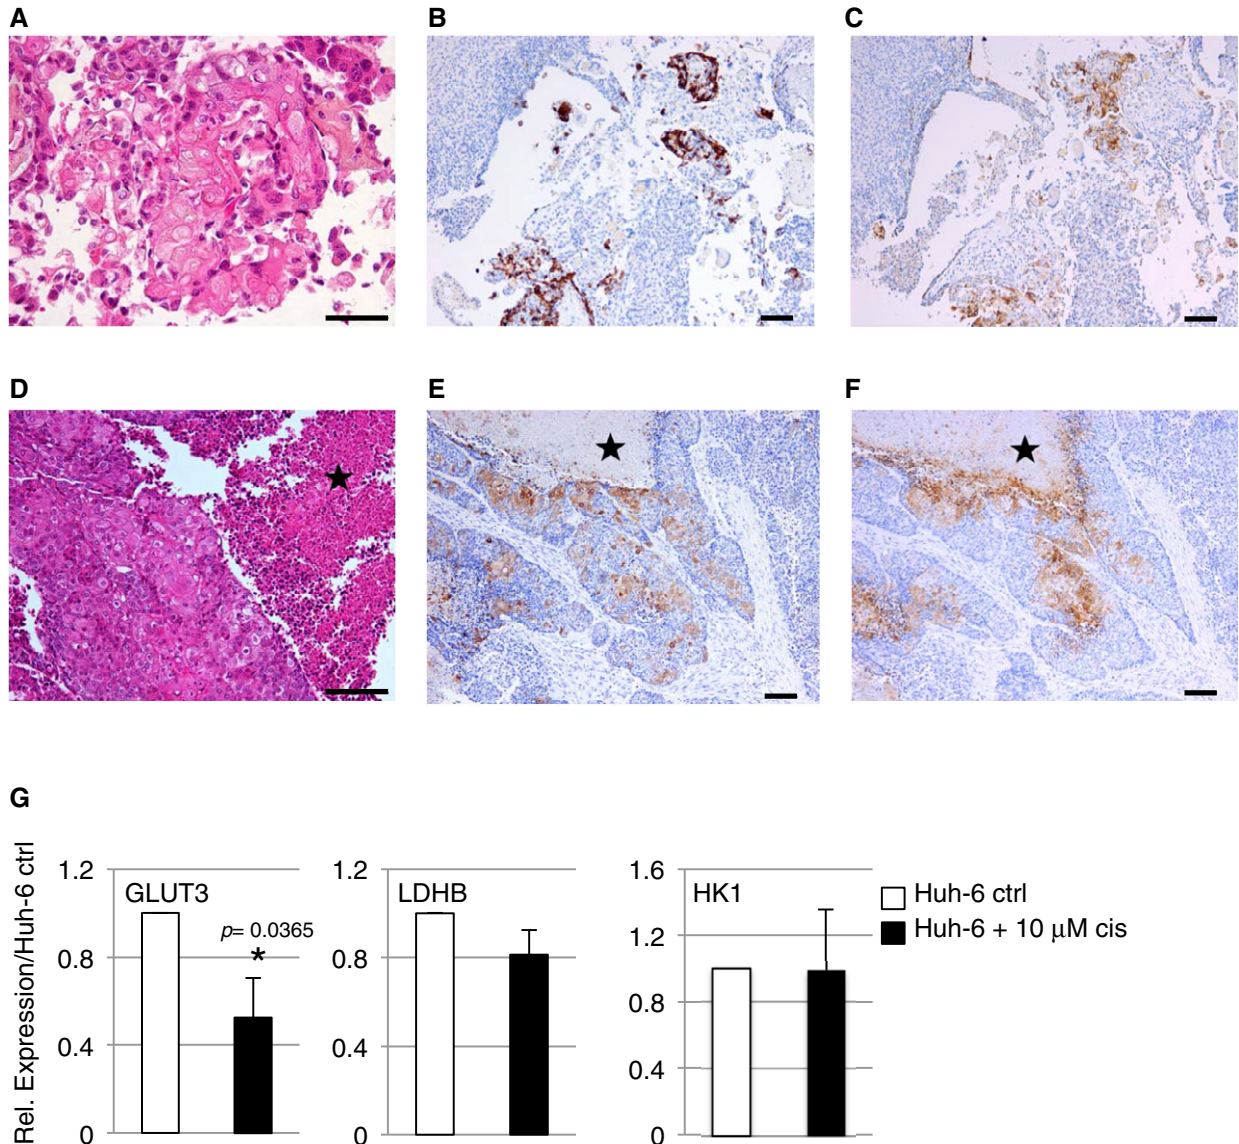

**Figure EV2. Representative histological and immunohistochemistry findings.**

A–F GLUT3 reactivity was observed in the embryonal and squamous components only. Standard HPS stain shows squamous differentiation foci (A), confirmed by a CK5/6 immunostain (B and E). In the two tumors shown (C and F), focal mild 1+ cytoplasmic, and moderate 2+ membranous GLUT3 reactivity is seen. The embryonal component of the second tumor (D–F) shows a serpiginous architecture, with foci of tumor necrosis (star). Scale bars = 100  $\mu$ m, except for (A) (scale bar = 50  $\mu$ m).  
 G Relative expression of *GLUT3*, *LDHB*, and *HK1* in Huh-6 cells treated or not for 24 h with cisplatin (cis). Data show means  $\pm$  s.d. ( $n = 4$ ). *P*-values were determined by Mann–Whitney test.

**Figure EV3.  $\alpha$ -Catenin interacts with short but not long deletion HB mutant  $\beta$ -catenin.**

A Ribbon representation of the modeled 3D structure of human  $\beta$ -catenin in complex with human  $\alpha$ -catenin. Residues that are absent in HepG2 and Hep293TT are in dark blue, and are responsible for binding to  $\alpha$ -catenin. The experimental binding position of BCL9 on  $\beta$ -catenin is shown in pink for information. However, this model does not presume that BCL9 and  $\alpha$ -catenin are able to bind concomitantly to  $\beta$ -catenin.  
 B Co-immunoprecipitation using protein extracts from 293T cells transfected with the indicated mutant forms of VSV- $\beta$ -catenin and FLAG- $\alpha$ -catenin constructs or empty-FLAG as negative control. Proteins were immunoprecipitated using anti-FLAG antibody.  
 C Protein extracts from the indicated cell lines were used for endogenous  $\alpha$ -catenin or control IgG immunoprecipitation, followed by Western blot using the indicated antibodies. The arrowheads indicate the position of the full-length or deleted ( $\Delta$ ex3–4) forms of  $\beta$ -catenin. TI, total input; IP, immunoprecipitation.

Source data are available online for this figure.

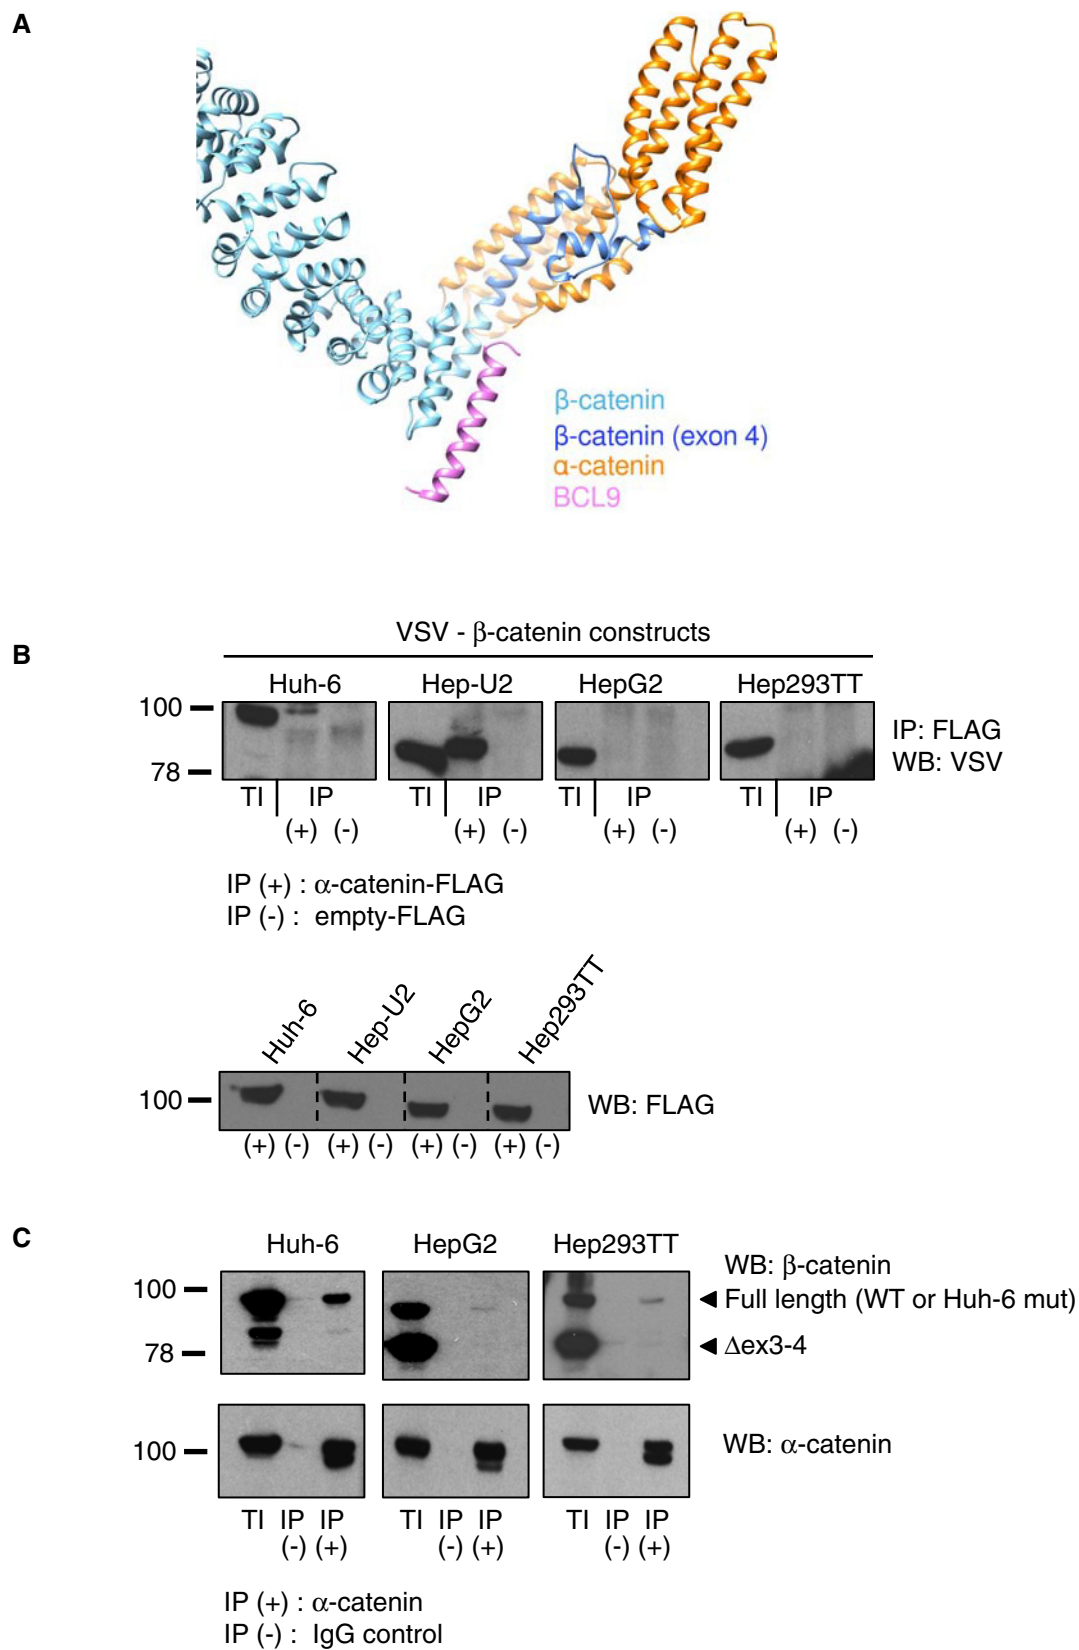

Figure EV3.
