# Supplementary material for: Mutant CTNNB1 and histological heterogeneity define metabolic subtypes of hepatoblastoma
Source: PubMed Central journal article supplement (PMC5666308; doi:10.15252/emmm.201707814), 2017-09-19

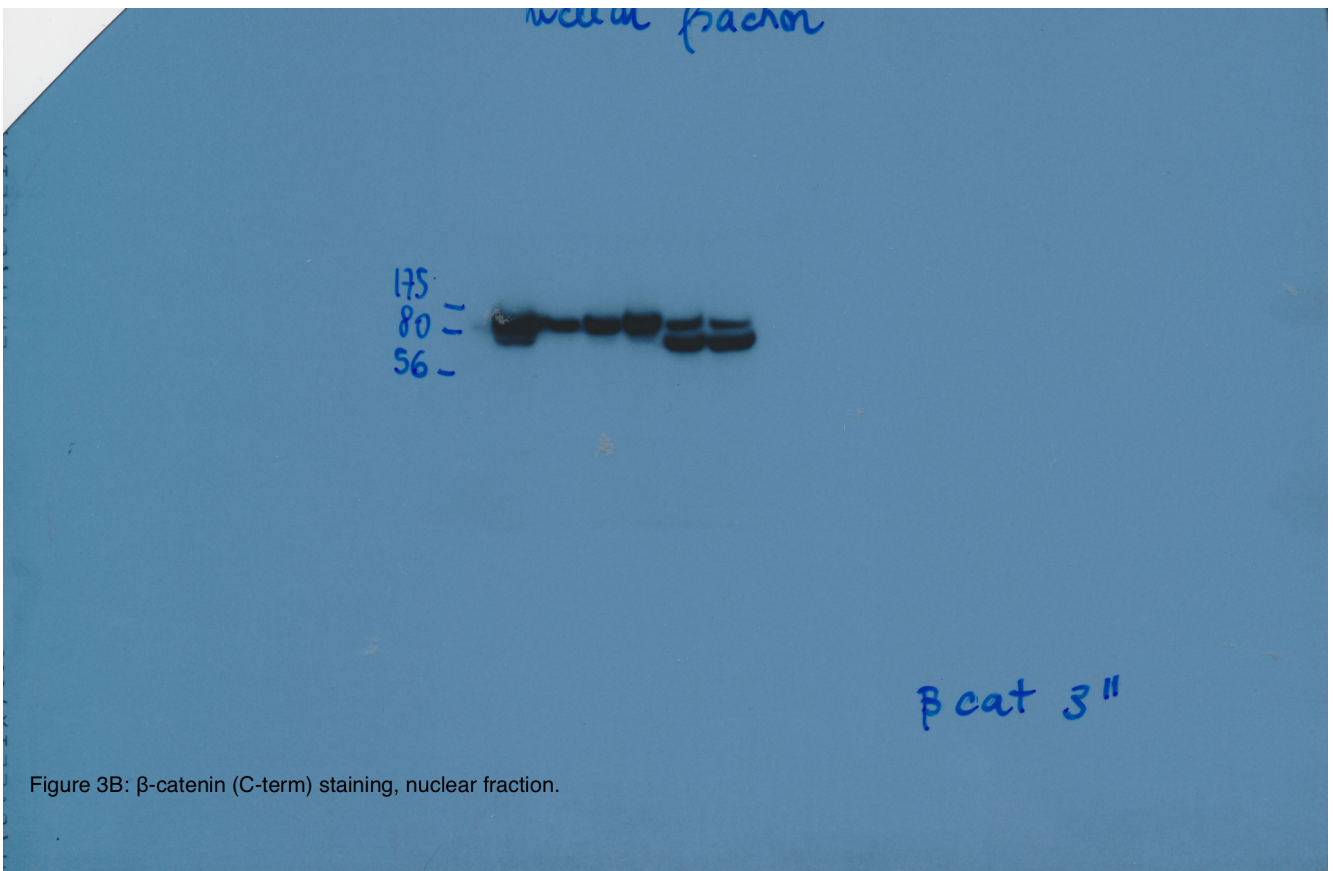

Figure 3B:  $\beta$ -catenin (C-term) staining, nuclear fraction.

Figure 3B:  $\beta$ catenin (C-Term) staining, cytoplasmic staining.

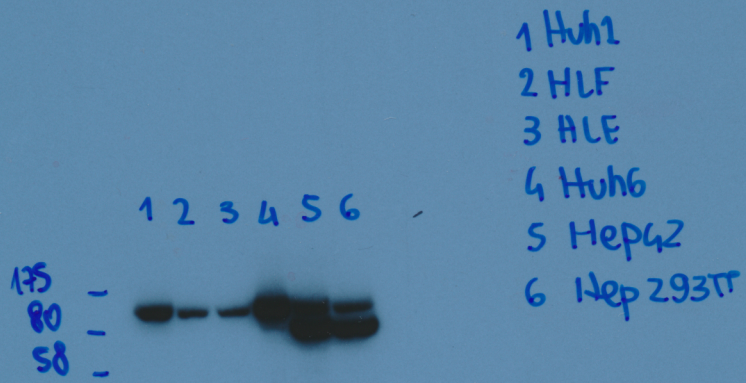

(n.s.)  
more bCAT 1:1000  
10"  
d more 1:5000

cytoplasmic fraction

rabbit  $\beta$ TUB n. 34 1:1000  
1<sup>st</sup> exposure

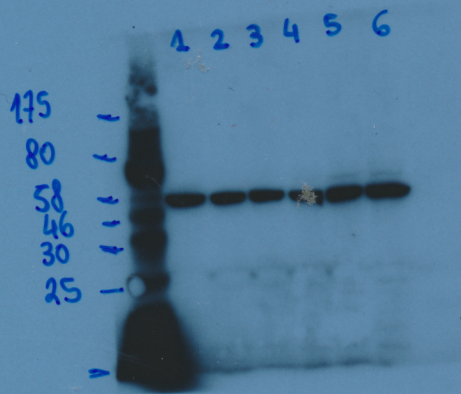

1. Huh1
2. HLF
3. HLE
4. Huh6
5. HepG2
6. Hep293T

$\alpha$  rabbit 1:5000

Figure 3B: Tubulin staining, cytoplasmic fraction

Figure 3B:  $\beta$ catenin (N-term) staining, nuclear fraction.

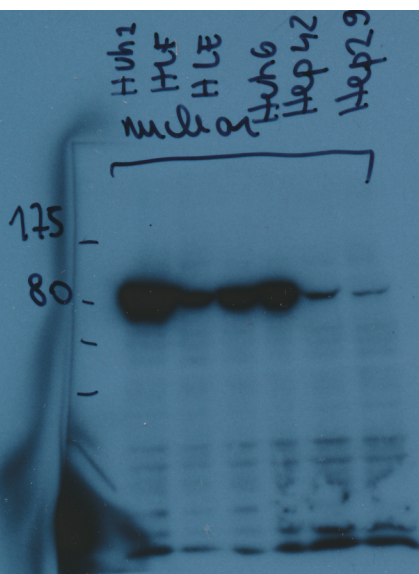

$\Delta N$   $\beta$ cat 2bcam  
Soup 1h30' NT  
+  
d rabbit 1:5000  
1h NT

1'

Figure 3B:  $\beta$ catenin (N-term) staining, cytoplasmic fraction.

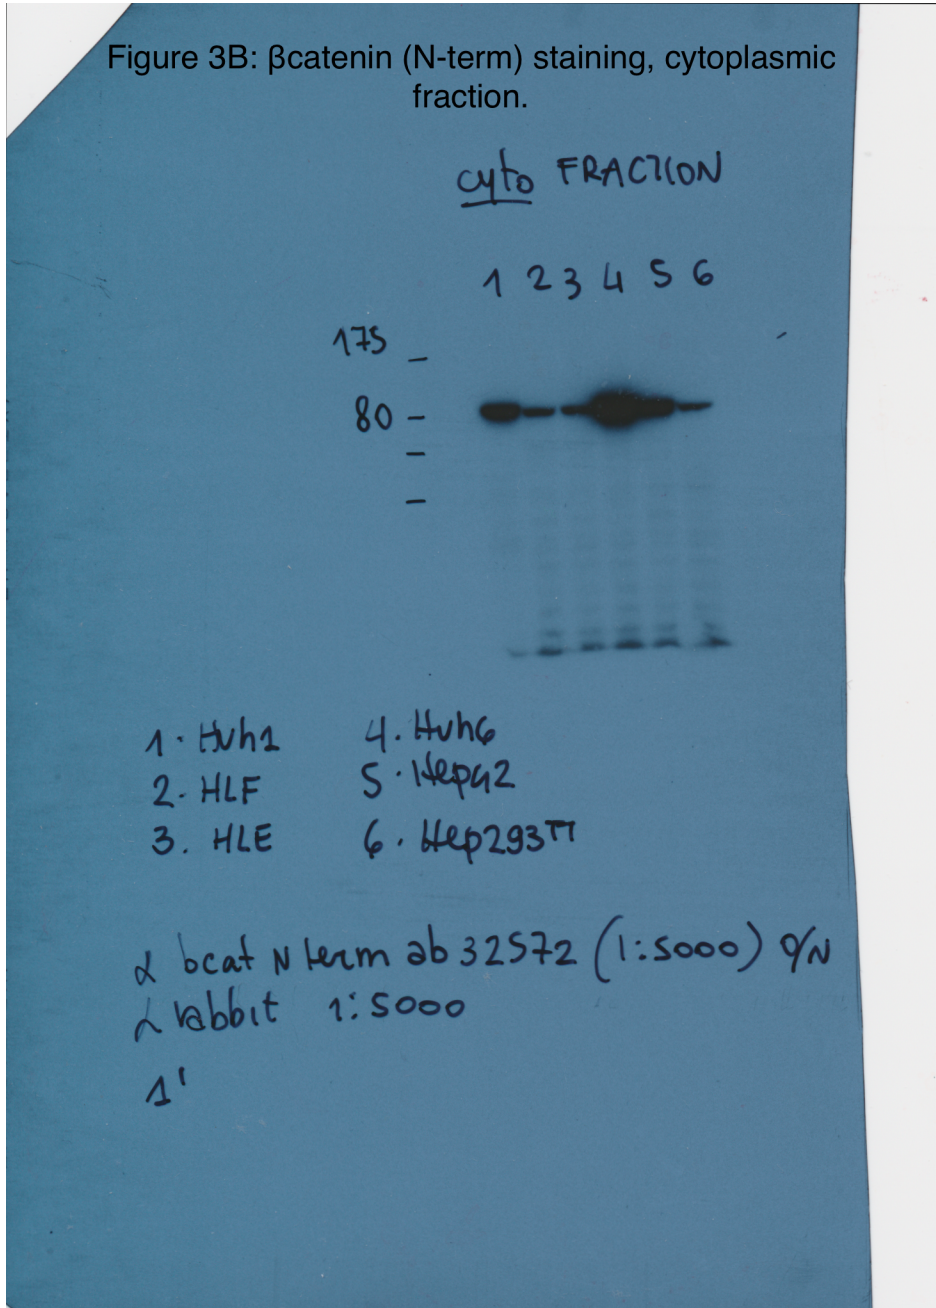

Figure 3B: PARP staining, nuclear fraction.

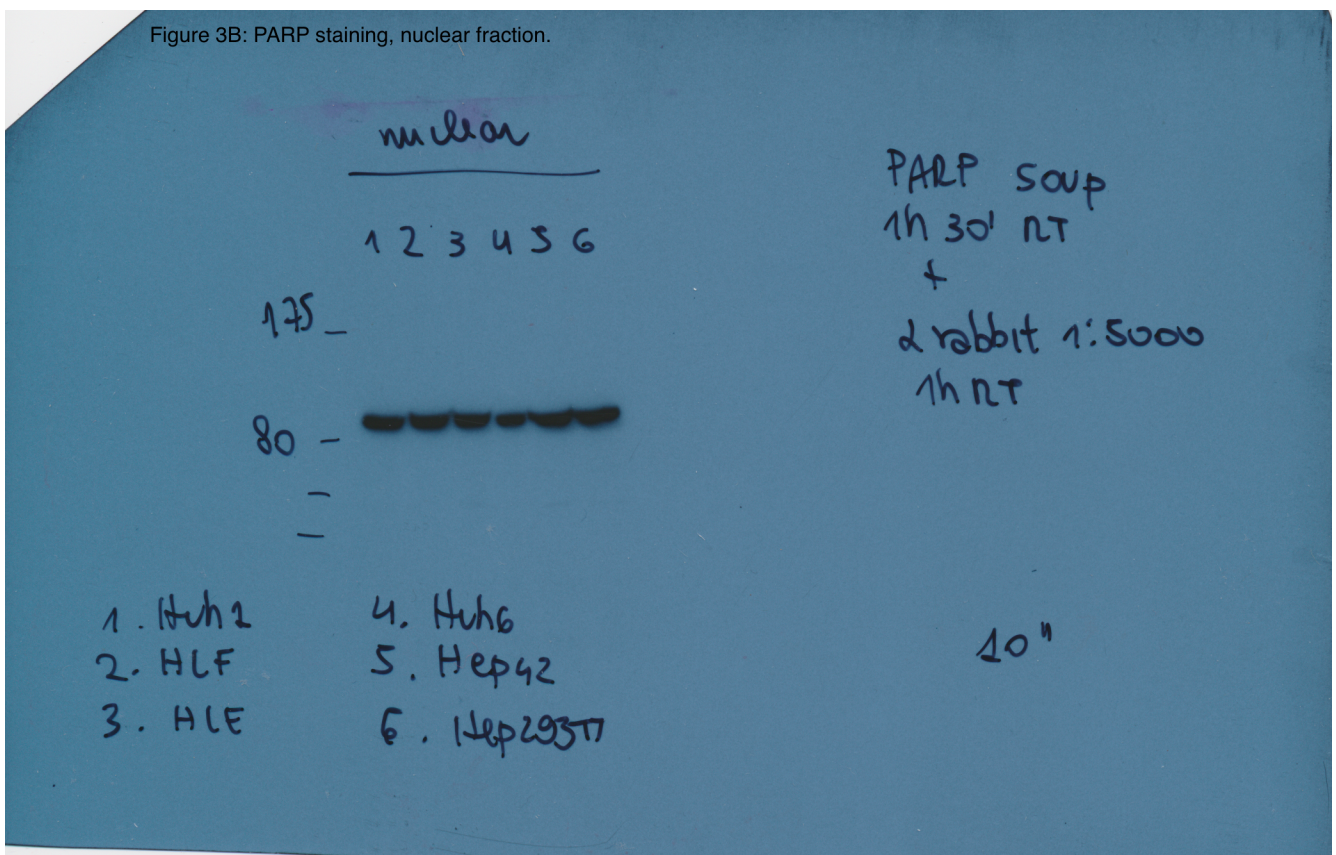

Supplement: EMMM-9-1589-s008.pdf [file EMMM-9-1589-s008.pdf]
